# Supplementary material for: Effects of water table level and nitrogen deposition on methane and nitrous oxide emissions in an alpine peatland
Source: Copernicus journal article supplement (doi:10.5194/bg-2022-53), 2022-05-20
Supplement: Supplementary file 1 [file bg-2022-53-supplement.pdf]

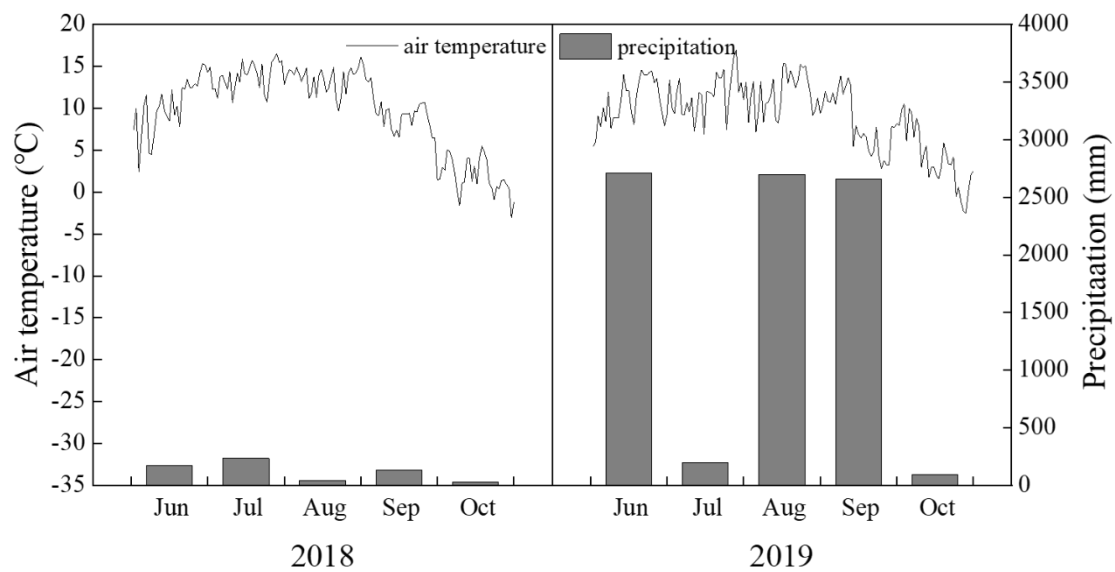

1 Figure S1. Variations of daily air temperature and monthly precipitation during the growing seasons in  
 2 2018 and 2019.  
 3

4 Table S1. The global warming potential (GWP) (CH<sub>4</sub> and N<sub>2</sub>O) during the growing seasons in 2018 and  
5 2019 under water table (WT) and N deposition (N) treatments, and its contributions from cumulative  
6 CH<sub>4</sub> and N<sub>2</sub>O emissions.

|      |                  | WT <sub>-30</sub>                        |                 |                  | WT <sub>0</sub>                          |                 |                  | WT <sub>10</sub>                         |                 |                  |
|------|------------------|------------------------------------------|-----------------|------------------|------------------------------------------|-----------------|------------------|------------------------------------------|-----------------|------------------|
|      |                  | GWP                                      | CH <sub>4</sub> | N <sub>2</sub> O | GWP                                      | CH <sub>4</sub> | N <sub>2</sub> O | GWP                                      | CH <sub>4</sub> | N <sub>2</sub> O |
|      |                  | (g CO <sub>2</sub> -eq m <sup>-2</sup> ) | (%)             | (%)              | (g CO <sub>2</sub> -eq m <sup>-2</sup> ) | (%)             | (%)              | (g CO <sub>2</sub> -eq m <sup>-2</sup> ) | (%)             | (%)              |
| 2018 | N <sub>0</sub>   | 19.26±3.50                               | -30%            | 130%             | 196.88±106.75                            | 87%             | 13%              | 834.98±252.26                            | 97%             | 3%               |
|      | N <sub>20</sub>  | 21.26±7.42                               | -104%           | 204%             | 915.49±77.41                             | 97%             | 3%               | 1113.86±314.48                           | 97%             | 3%               |
|      | N <sub>40</sub>  | 67.50±5.25                               | -8%             | 108%             | 367.78±101.27                            | 91%             | 9%               | 543.12±75.18                             | 87%             | 13%              |
|      | N <sub>80</sub>  | 60.43±7.84                               | -16%            | 116%             | 57.08±7.12                               | 3%              | 97%              | 221.51±35.79                             | 60%             | 40%              |
|      | N <sub>160</sub> | 195.60±8.52                              | -4%             | 104%             | 216.33±5.47                              | 7%              | 93%              | 269.57±35.93                             | 35%             | 65%              |
| 2019 | N <sub>0</sub>   | 11.17±1.74                               | -112%           | 212%             | 102.99±37.78                             | 67%             | 33%              | 525.91±73.40                             | 96%             | 4%               |
|      | N <sub>20</sub>  | 29.51±4.64                               | -40%            | 140%             | 274.93±21.98                             | 84%             | 16%              | 667.04±24.27                             | 94%             | 6%               |
|      | N <sub>40</sub>  | 48.71±6.84                               | -15%            | 115%             | 258.14±38.17                             | 76%             | 24%              | 495.90±10.71                             | 88%             | 12%              |
|      | N <sub>80</sub>  | 90.35±3.36                               | -14%            | 114%             | 118.41±12.97                             | 24%             | 76%              | 425.57±91.89                             | 73%             | 27%              |
|      | N <sub>160</sub> | 153.11±9.10                              | -5%             | 105%             | 223.82±5.54                              | 6%              | 94%              | 454.95±31.28                             | 62%             | 38%              |

7 Data are mean ± SE (n=3).

8
